# Supplementary material for: Rural community health workers’ readiness for mobile-phone based telemedicine uptake in India
Source: PubMed Central journal article supplement — J Rural Med. 2022 Jul 1;17(3):166–70. doi: 10.2185/jrm.2021-044 (PMC9263958; doi:10.2185/jrm.2021-044), 2022-07-01
Supplement: jrm-17-166-s001.pdf [file jrm-17-166-s001.pdf]

## Supplementary material 1: Questionnaire to assess the readiness of MBT

### Domain wise questions:

**Knowledge:** Question Numbers: 1, 3, 24C to 24H, 25, 25B-I, 25B-II-i, 25B-III-i, 25B-IV-i, 25C

**Attitude:** Question Numbers 4 to 23

**Practices:** Question numbers: 25A, 25B, 25B II, 25B III, 25B IV

1. Do you know what is telemedicine?
  - a. Never heard about it; b. Heard about it but no idea; c. Know a little bit about it; d. Knowledgeable about it; e. Very knowledgeable about it.
2. Have ever used Telemedicine (obtained or provided services)?
  - a. Yes; b. No; c. Don't know
3. Telemedicine system can be established using
  - a. Desktop computer/Laptop; b. Mobile phone; c. Ipads/tablet; d. All of the above; e. Don't know
4. Patients can be diagnosed and treated (to a certain extent) remotely using telemedicine?
  - a. Strongly disagree; b. Somewhat disagree; c. Neither agree nor disagree; d. Somewhat agree; e. Strongly agree

| Q no. | Using the mobile based telemedicine (consultation) system                                                                                                              | Strongly disagree | Somewh at disagree | Neither agree nor disagree | Somewhat agree | Strongly agree |
|-------|------------------------------------------------------------------------------------------------------------------------------------------------------------------------|-------------------|--------------------|----------------------------|----------------|----------------|
| 5     | Doctor can see and treat the patient remotely (i.e., patient sitting at subcentre/village and doctor sitting at Hospital which is far away from the subcentre/village) |                   |                    |                            |                |                |
| 6     | Mobile based telemedicine will be a more accessible way providing healthcare to rural population                                                                       |                   |                    |                            |                |                |
| 7     | Mobile based telemedicine will help in early detection of disease and prompt referral                                                                                  |                   |                    |                            |                |                |
| 8     | Mobile based telemedicine is more affordable (less money in travel) than conventional medical consultation                                                             |                   |                    |                            |                |                |
| 9     | Patient has to pay more money as user fee and doctor consultation fee                                                                                                  |                   |                    |                            |                |                |

|    |                                                                                                                        |  |  |  |  |  |
|----|------------------------------------------------------------------------------------------------------------------------|--|--|--|--|--|
|    | under mobile based tele-consultation                                                                                   |  |  |  |  |  |
| 10 | Patient should be charged nominally to avail the mobile based tele-consultation                                        |  |  |  |  |  |
| 11 | Patient will be equally satisfied in mobile based tele-consultation compared to conventional face to face consultation |  |  |  |  |  |
| 12 | My workload will increase if mobile based tele-consultation is started in my centre/village                            |  |  |  |  |  |
| 13 | The paper work will decrease and quality of data will improve via mobile based telemedicine system                     |  |  |  |  |  |
| 14 | There is no need provide any incentives to me for facilitating mobile based teleconsultation                           |  |  |  |  |  |
| 15 | Mobile based tele-consultation should be available in all villages                                                     |  |  |  |  |  |
| 16 | PHC doctors should be providing the mobile based tele consultations in their respective village                        |  |  |  |  |  |
| 17 | Specialist doctors should also be made available for mobile based tele-consultation if referred by PHC doctor          |  |  |  |  |  |
| 18 | Only ANM should be provided this responsibility of running the mobile based tele-consultation OPDs                     |  |  |  |  |  |
| 19 | ASHAs can run the mobile based tele-consultation OPDs after training                                                   |  |  |  |  |  |
| 20 | Mobile based tele-consultation should be available only in health subcentres                                           |  |  |  |  |  |
| 21 | Mobile based tele-consultation should be provided only during office hours (8am-3pm)                                   |  |  |  |  |  |

|    |                                                                                                                |  |  |  |  |  |
|----|----------------------------------------------------------------------------------------------------------------|--|--|--|--|--|
| 22 | Mobile based tele-consultation should be provided beyond routine office hours like in the evening around 4/5pm |  |  |  |  |  |
| 23 | Trainings and continuing education can be provided via mobile based telemedicine system                        |  |  |  |  |  |

24. Do you have mobile phone with you? a. Yes; b. No

- A. If yes, is it a smart phone? a. Yes; b. No; c. Don't know.
- B. If no, do any of your family member or colleague have smart mobile phone?  
a. Yes-3; b. No-2; c. Don't know-1
- C. Level of knowledge of using smart mobile phone.  
a. Novice; b. Advanced beginner; c. Competent; d. Proficient; e. Expert ; f. Not applicable (if none has smart phone)
- D. Level of expertise in typing text and numbers (as part of SMS or others) in mobile phone?  
a. Novice; b. Advanced beginner; c. Competent; d. Proficient; e. Expert
- E. Level of expertise in using headphones (in listening songs or videos).  
a. Novice; b. Advanced beginner; c. Competent; d. Proficient; e. Expert
- F. Level of expertise in using bluetooth (in listening songs or videos or calls without wire).  
a. Novice; b. Advanced beginner; c. Competent; d. Proficient; e. Expert;
- G. Level of expertise in operating inbuilt camera of the mobile phone?  
a. Novice; b. Advanced beginner; c. Competent; d. Proficient; e. Expert
- H. Level of expertise in operating printers?  
a. Novice; b. Advanced beginner; c. Competent; d. Proficient; e. Expert

25. Have ever used internet (computer/mobile phone/other device)? a. Yes; b. No; c. Don't know

- A. Do you have mobile data/internet in your smart phone?  
a. Yes; b. No; c. Don't know
- B. Have you ever used internet in your phone? a. Yes; b. No; c. Don't know.
  - I. Level of knowledge of using internet in any device (computer/mobile phone/tablet).  
a. Novice; b. Advanced beginner; c. Competent; d. Proficient; e. Expert
  - II. Have you ever used skype video calls? a. Yes; b. No; c. Don't know; d. Never heard
    - i. Do you know how to initiate and complete a skype call?

a. Yes; b. No; c. Don't know; d. Not applicable if never heard-

III. Have you ever used whatsapp video calls? a. Yes; b. No; c. Don't know; d. Never heard

i. Do you know how to initiate and complete a whatsapp video calls?  
a. Yes; b. No; c. Don't know; d. Not applicable if never heard

IV. Have you ever used facebook videocalls? a. Yes; b. No; c. Don't know; d. Never heard

i. Do you know how to initiate and complete a facebook video call?  
a. Yes; b. No; c. Don't know; d. Not applicable if never heard

C. Level of expertise in checking, drafting and sending emails?

a. Novice; b. Advanced beginner; c. Competent; d. Proficient; e. Expert
